# Supplementary material for: Experimental and DFT study of F− removed by Cl−-hydrotalcite
Source: Royal Society of Chemistry journal article supplement (doi:10.1039/d2nj01360f), 2022-01-01
Supplement: d2nj01360f6.pdf [file d2nj01360f6.pdf]

ARTICLE

## Supporting Information

Received 00th January 20xx,  
Accepted 00th January 20xx

### Experimental and DFT study of F<sup>-</sup> removed by Cl-hydrotalcite

DOI: 10.1039/x0xx00000x

Ruicong Wang,<sup>a</sup> Danqi Wang,<sup>a</sup> Xinyuan Wang,<sup>a</sup> Wencai Peng<sup>a,b,\*</sup> Yi Wang,<sup>a</sup> Jinli Zhang,<sup>c</sup>

X-ray powder diffraction (XRD) pattern of Cl-hydrotalcite was collected using an X-ray diffractometer (Bruker D8 Advance, Germany) with a copper K $\alpha$  source ( $\lambda = 0.15418$  nm) at a constant scanning rate ( $5^\circ \text{ min}^{-1}$ ) over the  $2\theta$  range  $10^\circ$ – $90^\circ$ . Test voltage was 40 kV and test current was 40 mA.

The XRD spectrum of Cl-LDH is shown in Fig. S1. The diffraction peak of the (0 0 3) crystal face of hydrotalcite is the strongest, the diffraction peaks of (0 0 6) and (0 0 9) crystal faces of hydrotalcite are also strong. These diffraction peaks all belong to characteristic peaks of hydrotalcite.

MSD was calculated by Equation (1).

$$\text{MSD}(t) = \left[ \frac{1}{N} \sum_{i=1}^N |R_i(t) - R_i(0)|^2 \right] \quad (1)$$

The diffusion coefficient (D) of F<sup>-</sup> was estimated by Einstein equation, as shown in Equation (2):

$$D = \frac{1}{2dN} \lim_{t \rightarrow \infty} \frac{d}{dt} \sum_{i=1}^N \langle [R_i(t) - R_i(0)]^2 \rangle \quad (2)$$

Here, d is the dimension of the system and N is the number of target molecules in the system.  $R_i(t)$  and  $R_i(0)$  are the coordinates of fluorine at time T and time 0, respectively. Plot the obtained MSD data with time and fit the straight line. The slope a is  $\frac{d}{dt} \sum_{i=1}^N \langle [R_i(t) - R_i(0)]^2 \rangle$ . Since MSD has averaged the ion number N, the diffusion coefficient can be simplified as:

$$D = \frac{a}{6} \quad (3)$$

In this article, the Fukui functions are defined by the following formula:

$$f(r) = \left[ \frac{\partial \rho(r)}{\partial N} \right]_V \quad (4)$$

In the above equation,  $\rho(r)$  is the electron density function, N is the total number of electrons in the system, and V is the external potential energy. In this study, the electrophilic Fukui function (f<sup>-</sup>) and the nucleophilic Fukui function (f<sup>+</sup>) are used, and their expressions are as follows:

$$f^-(r) = \rho_N(r) - \rho_{N-1}(r) \quad (5)$$

$$f^+(r) = \rho_{N+1}(r) - \rho_N(r) \quad (6)$$

Here,  $\rho_N(r)$  is the density function under normal conditions.  $\rho_{N-1}(r)$  and  $\rho_{N+1}(r)$  are the density functions of the system with one unit of positive charge and one unit of negative charge, respectively. The greater the isosurface of the value of f<sup>-</sup> and f<sup>+</sup> near the atom is, the easier it is for the electrophilic reaction and nucleophilic reaction to occur on the atom.

<sup>a</sup> School of Chemistry and Chemical Engineering, Shihezi University, Shihezi 832003, Xinjiang, China.

<sup>b</sup> Key Laboratory for Green Processing of Chemical Engineering of Xinjiang Bingtuan, Shihezi, Xinjiang, China.

<sup>c</sup> School of Chemical Engineering, Tianjin University, Tianjin 300350, Tianjin, China.

\* Corresponding author:

Tel: +86 - 18409071980. E-mail: pengwencai@shzu.edu.cn (Wencai Peng)

## ARTICLE

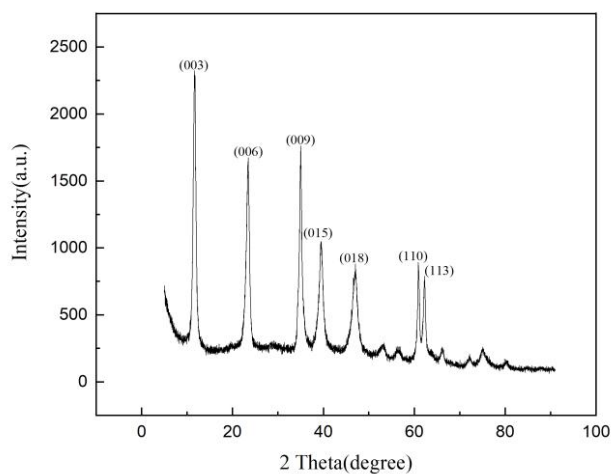

Fig. S1 XRD pattern of Cl-hydroxalcite.

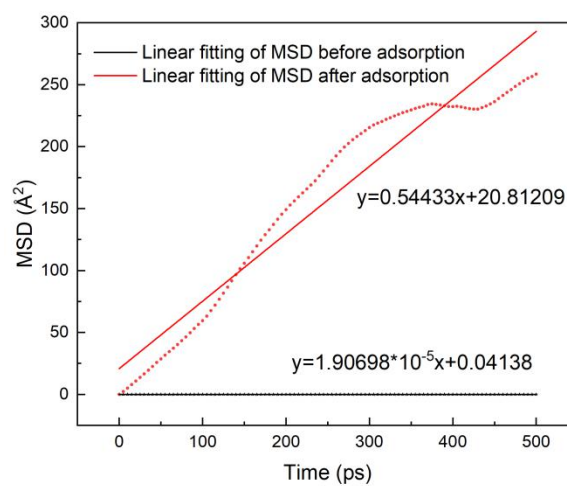

Fig. S3 MSD plot of F in water and in hydroxalcite solution.

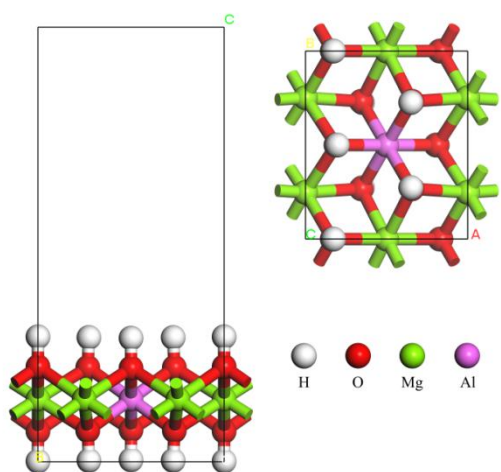

Fig. S2 Model of hydroxalcite.

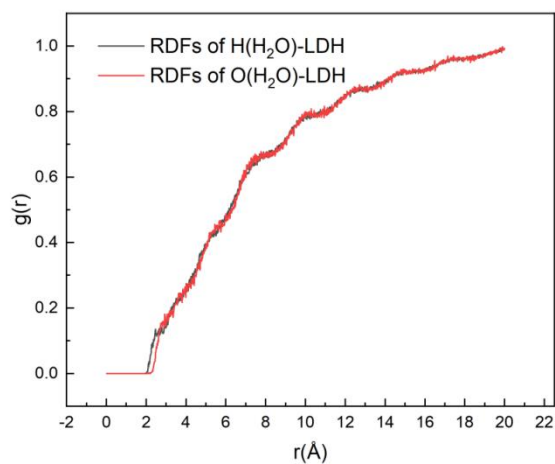Fig. S4 RDFs of H(H<sub>2</sub>O)-LDH and O(H<sub>2</sub>O)-LDH.

## ARTICLE

**Table S1** The Fukui functions and dual descriptors of the hydrotalcite calculated at DFT/GGA/DNP

|                 | $f_{LDH}^+$ | $f_{LDH}^-$ | $f_{F-LDH}^+$ | $f_{F-LDH}^-$ | $f_{Cl-LDH}^+$ | $f_{Cl-LDH}^-$ | $\Delta f_{LDH}$ | $\Delta f_{F-LDH}$ | $\Delta f_{Cl-LDH}$ |
|-----------------|-------------|-------------|---------------|---------------|----------------|----------------|------------------|--------------------|---------------------|
| O(1)            | -0.056      | 0.015       | -0.009        | 0.049         | -0.016         | 0.004          | -0.071           | -0.058             | -0.020              |
| H(2)            | 0.187       | 0.072       | 0.045         | 0.054         | 0.053          | 0.042          | 0.115            | -0.009             | 0.011               |
| O(3)            | -0.056      | 0.015       | -0.100        | 0.006         | -0.094         | -0.002         | -0.071           | -0.106             | -0.092              |
| H(4)            | 0.187       | 0.072       | 0.334         | 0.068         | 0.320          | 0.028          | 0.115            | 0.266              | 0.292               |
| O(5)            | -0.056      | 0.015       | -0.100        | 0.006         | -0.094         | -0.002         | -0.071           | -0.106             | -0.092              |
| H(6)            | 0.187       | 0.072       | 0.335         | 0.068         | 0.320          | 0.028          | 0.115            | 0.267              | 0.292               |
| O(7)            | -0.056      | 0.015       | -0.009        | 0.049         | -0.016         | 0.005          | -0.071           | -0.058             | -0.021              |
| H(8)            | 0.187       | 0.072       | 0.045         | 0.054         | 0.053          | 0.042          | 0.115            | -0.009             | 0.011               |
| Mg(9)           | 0.008       | 0.040       | -0.002        | 0.043         | 0.001          | 0.017          | -0.032           | -0.045             | -0.016              |
| Mg(10)          | 0.008       | 0.040       | -0.002        | 0.043         | 0.001          | 0.017          | -0.032           | -0.045             | -0.016              |
| Mg(11)          | 0.007       | 0.039       | -0.005        | 0.041         | -0.002         | 0.017          | -0.032           | -0.046             | -0.019              |
| O(12)           | -0.053      | 0.074       | -0.025        | 0.036         | -0.028         | 0.000          | -0.127           | -0.061             | -0.028              |
| H(13)           | 0.171       | 0.087       | 0.091         | 0.078         | 0.097          | 0.036          | 0.084            | 0.013              | 0.061               |
| O(14)           | -0.053      | 0.074       | -0.091        | 0.032         | -0.087         | 0.006          | -0.127           | -0.123             | -0.093              |
| H(15)           | 0.171       | 0.087       | 0.287         | 0.076         | 0.277          | 0.030          | 0.084            | 0.211              | 0.247               |
| Al(16)          | -0.040      | 0.026       | -0.063        | -0.003        | -0.062         | -0.020         | -0.066           | -0.06              | -0.042              |
| O(17)           | -0.056      | 0.022       | -0.010        | 0.049         | -0.015         | 0.006          | -0.078           | -0.059             | -0.021              |
| H(18)           | 0.184       | 0.073       | 0.041         | 0.055         | 0.043          | 0.032          | 0.111            | -0.014             | 0.011               |
| O(19)           | -0.056      | 0.022       | -0.095        | 0.014         | -0.090         | -0.001         | -0.078           | -0.109             | -0.089              |
| H(20)           | 0.188       | 0.073       | 0.324         | 0.072         | 0.313          | 0.029          | 0.115            | 0.252              | 0.284               |
| F <sup>-</sup>  |             |             | 0.008         | 0.111         |                |                |                  | -0.103             |                     |
| Cl <sup>-</sup> |             |             |               |               | 0.025          | 0.686          |                  |                    | -0.661              |

(Note: The  $f^+$  and  $f^-$  of F<sup>-</sup> and Cl<sup>-</sup> are both 1 before adsorption, respectively.)**Table S2** Mulliken charges of atoms before and after F<sup>-</sup> or Cl<sup>-</sup> adsorption on the surface of hydrotalcite

| System          | F <sup>-</sup> | Cl <sup>-</sup> | LDH    | Cl-LDH | F-LDH  |
|-----------------|----------------|-----------------|--------|--------|--------|
| -OH(1,2)        |                |                 | -0.466 | -0.489 | -0.510 |
| -OH(3,4)        |                |                 | -0.466 | -0.476 | -0.481 |
| -OH(5,6)        |                |                 | -0.466 | -0.476 | -0.481 |
| -OH(7,8)        |                |                 | -0.466 | -0.489 | -0.510 |
| Mg(9)           |                |                 | 1.088  | 1.078  | 1.079  |
| Mg(10)          |                |                 | 1.088  | 1.078  | 1.079  |
| Mg(11)          |                |                 | 1.093  | 1.083  | 1.084  |
| -OH(12,13)      |                |                 | -0.512 | -0.523 | -0.526 |
| -OH(14,15)      |                |                 | -0.512 | -0.521 | -0.524 |
| Al(16)          |                |                 | 1.546  | 1.531  | 1.518  |
| -OH(17,18)      |                |                 | -0.464 | -0.483 | -0.503 |
| -OH(19,20)      |                |                 | -0.464 | -0.474 | -0.478 |
| F <sup>-</sup>  | -1             |                 |        |        | -0.745 |
| Cl <sup>-</sup> |                | -1              |        | -0.841 |        |

Table S3 Hirshfeld charges of atoms before and after F<sup>-</sup> or Cl<sup>-</sup> adsorption on the surface of hydrotalcite

| System          | F <sup>-</sup> | Cl <sup>-</sup> | LDH     | Cl-LDH  | F-LDH   |
|-----------------|----------------|-----------------|---------|---------|---------|
| O(1)            |                |                 | -0.2483 | -0.2665 | -0.2798 |
| H(2)            |                |                 | 0.1905  | 0.0994  | 0.0897  |
| O(3)            |                |                 | -0.2483 | -0.2523 | -0.2546 |
| H(4)            |                |                 | 0.1905  | 0.1809  | 0.1747  |
| O(5)            |                |                 | -0.2483 | -0.2523 | -0.2546 |
| H(6)            |                |                 | 0.1905  | 0.1809  | 0.1747  |
| O(7)            |                |                 | -0.2483 | -0.2665 | -0.2799 |
| H(8)            |                |                 | 0.1905  | 0.0994  | 0.0897  |
| Mg(9)           |                |                 | 0.3826  | 0.3739  | 0.3701  |
| Mg(10)          |                |                 | 0.3826  | 0.3739  | 0.3701  |
| Mg(11)          |                |                 | 0.3910  | 0.3820  | 0.3777  |
| O(12)           |                |                 | -0.2931 | -0.2950 | -0.2945 |
| H(13)           |                |                 | 0.1752  | 0.1517  | 0.1569  |
| O(14)           |                |                 | -0.2931 | -0.2957 | -0.2971 |
| H(15)           |                |                 | 0.1752  | 0.1659  | 0.1600  |
| Al(16)          |                |                 | 0.4294  | 0.4127  | 0.4096  |
| O(17)           |                |                 | -0.2493 | -0.2675 | -0.2777 |
| H(18)           |                |                 | 0.1904  | 0.0971  | 0.0927  |
| O(19)           |                |                 | -0.2493 | -0.2524 | -0.2540 |
| H(20)           |                |                 | 0.1904  | 0.1814  | 0.1762  |
| F <sup>-</sup>  | -1             |                 |         |         | -0.4493 |
| Cl <sup>-</sup> |                | -1              |         | -0.5506 |         |
