# Supplementary figures and images for: Experimental and DFT study of F− removed by Cl−-hydrotalcite
Source: Royal Society of Chemistry journal article supplement (doi:10.1039/d2nj01360f), 2022-01-01

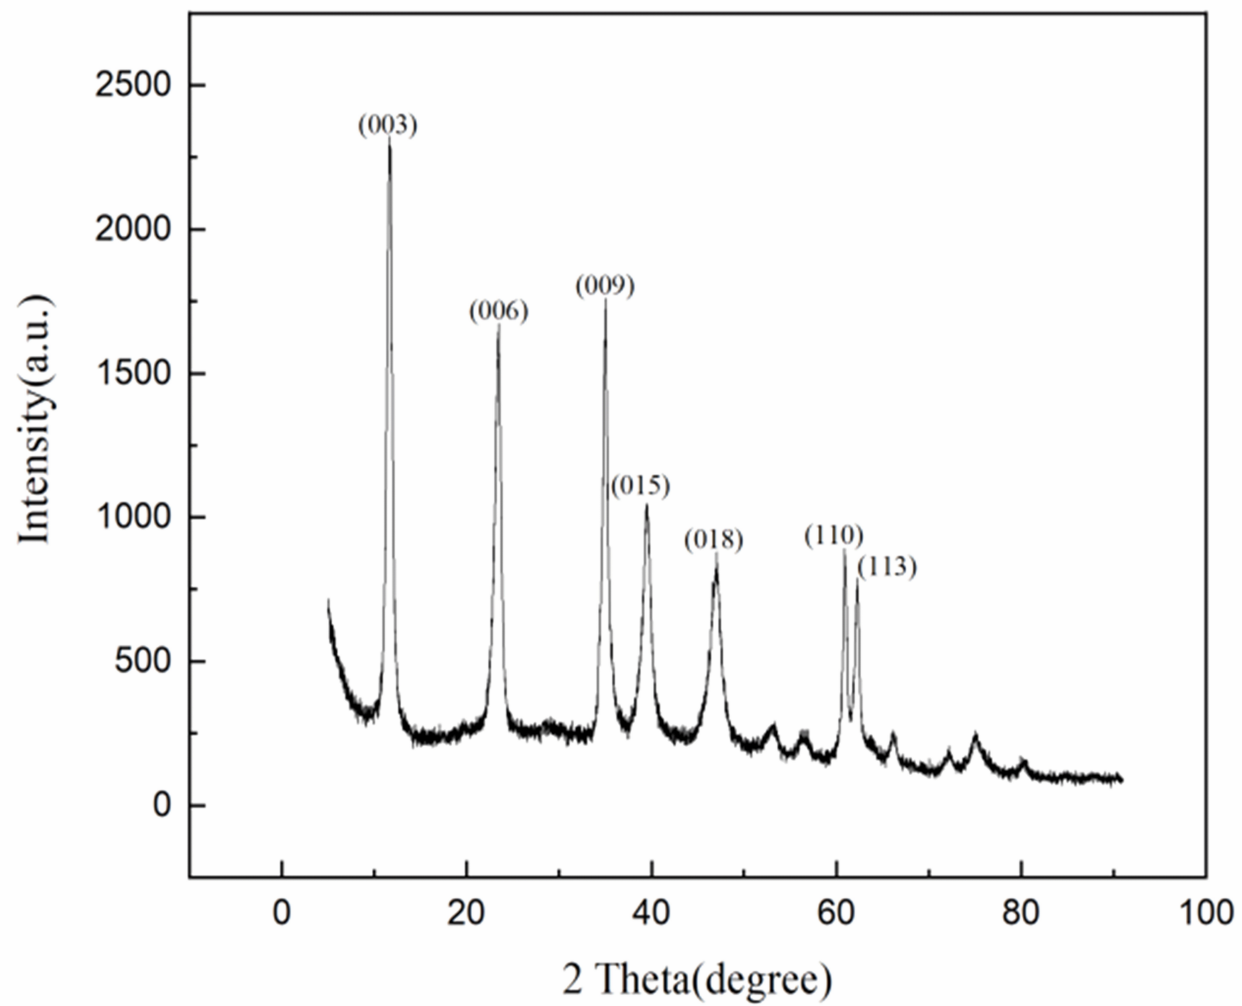

Supplement: d2nj01360f2.pdf [file d2nj01360f2.pdf]

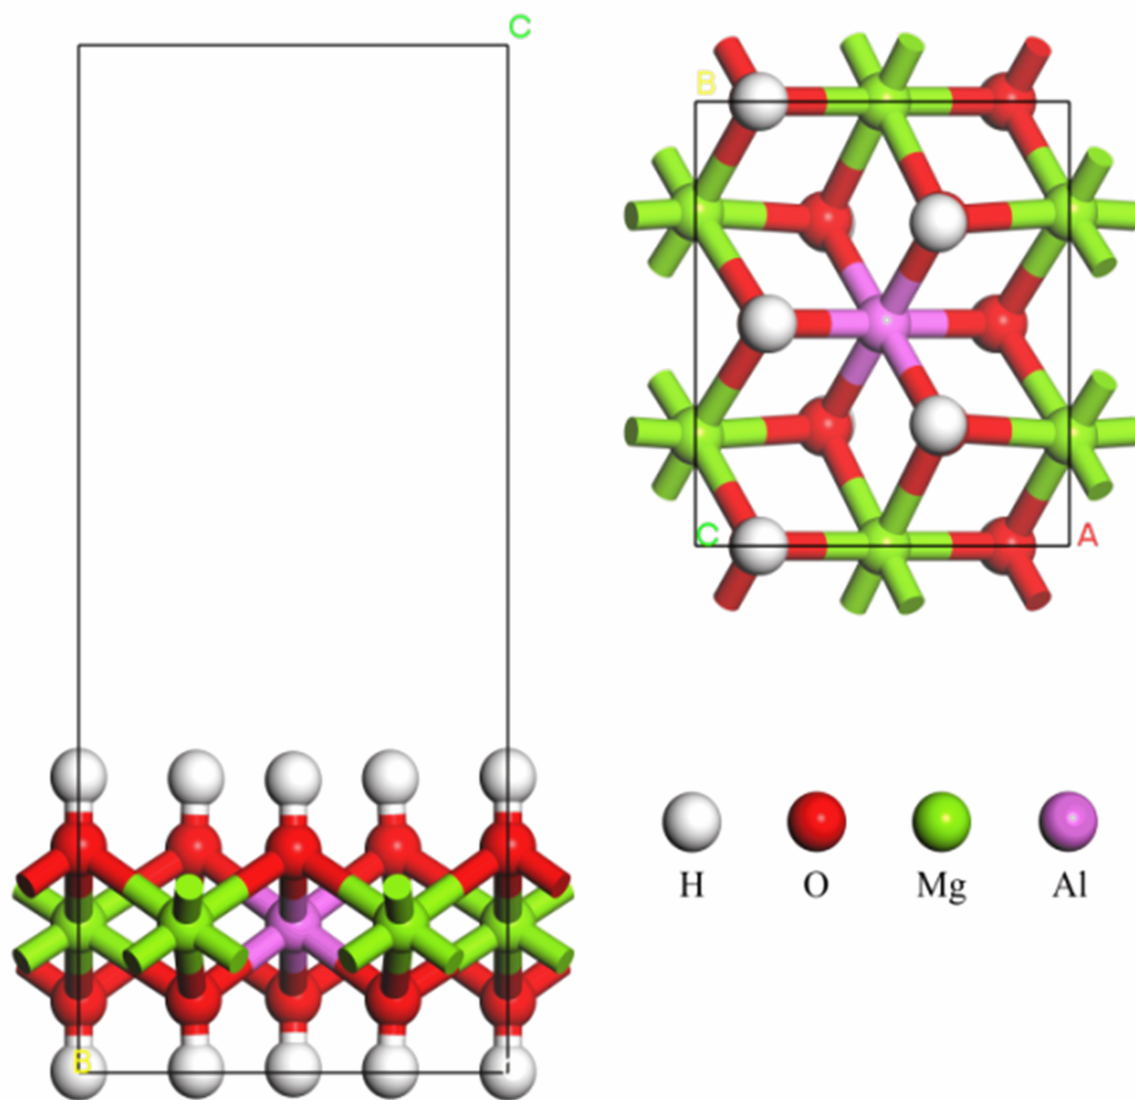

Supplement: d2nj01360f3.pdf [file d2nj01360f3.pdf]

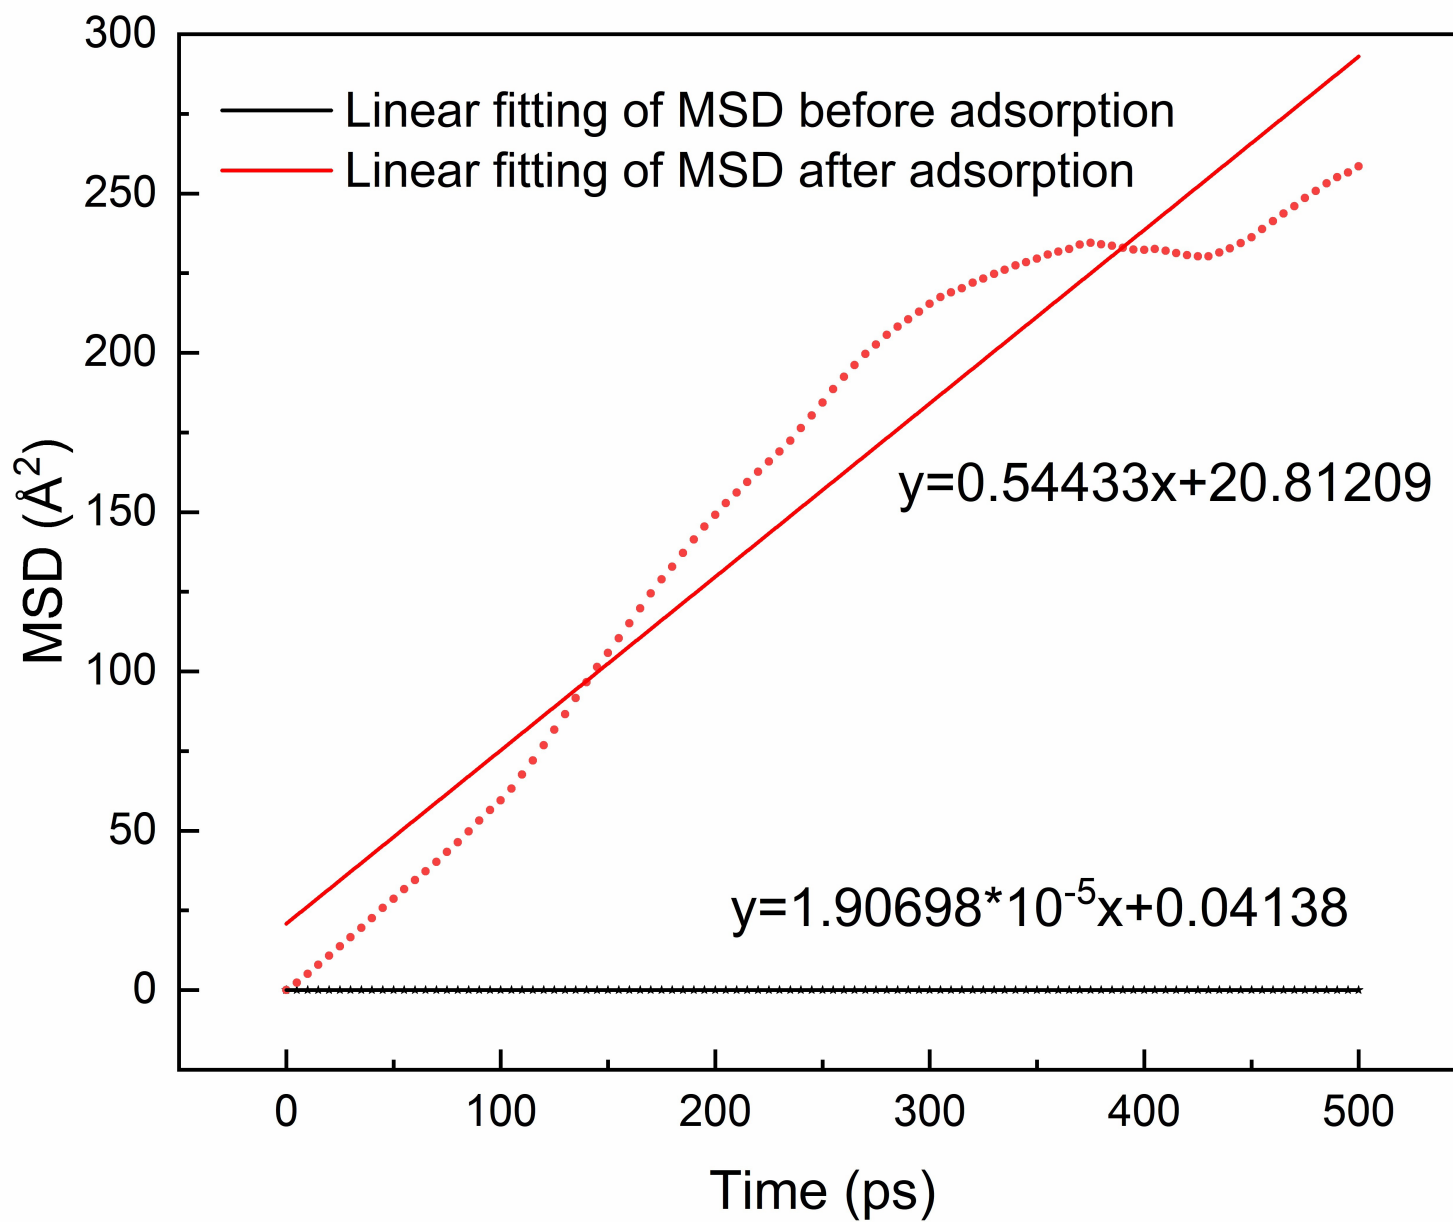

Supplement: d2nj01360f4.pdf [file d2nj01360f4.pdf]

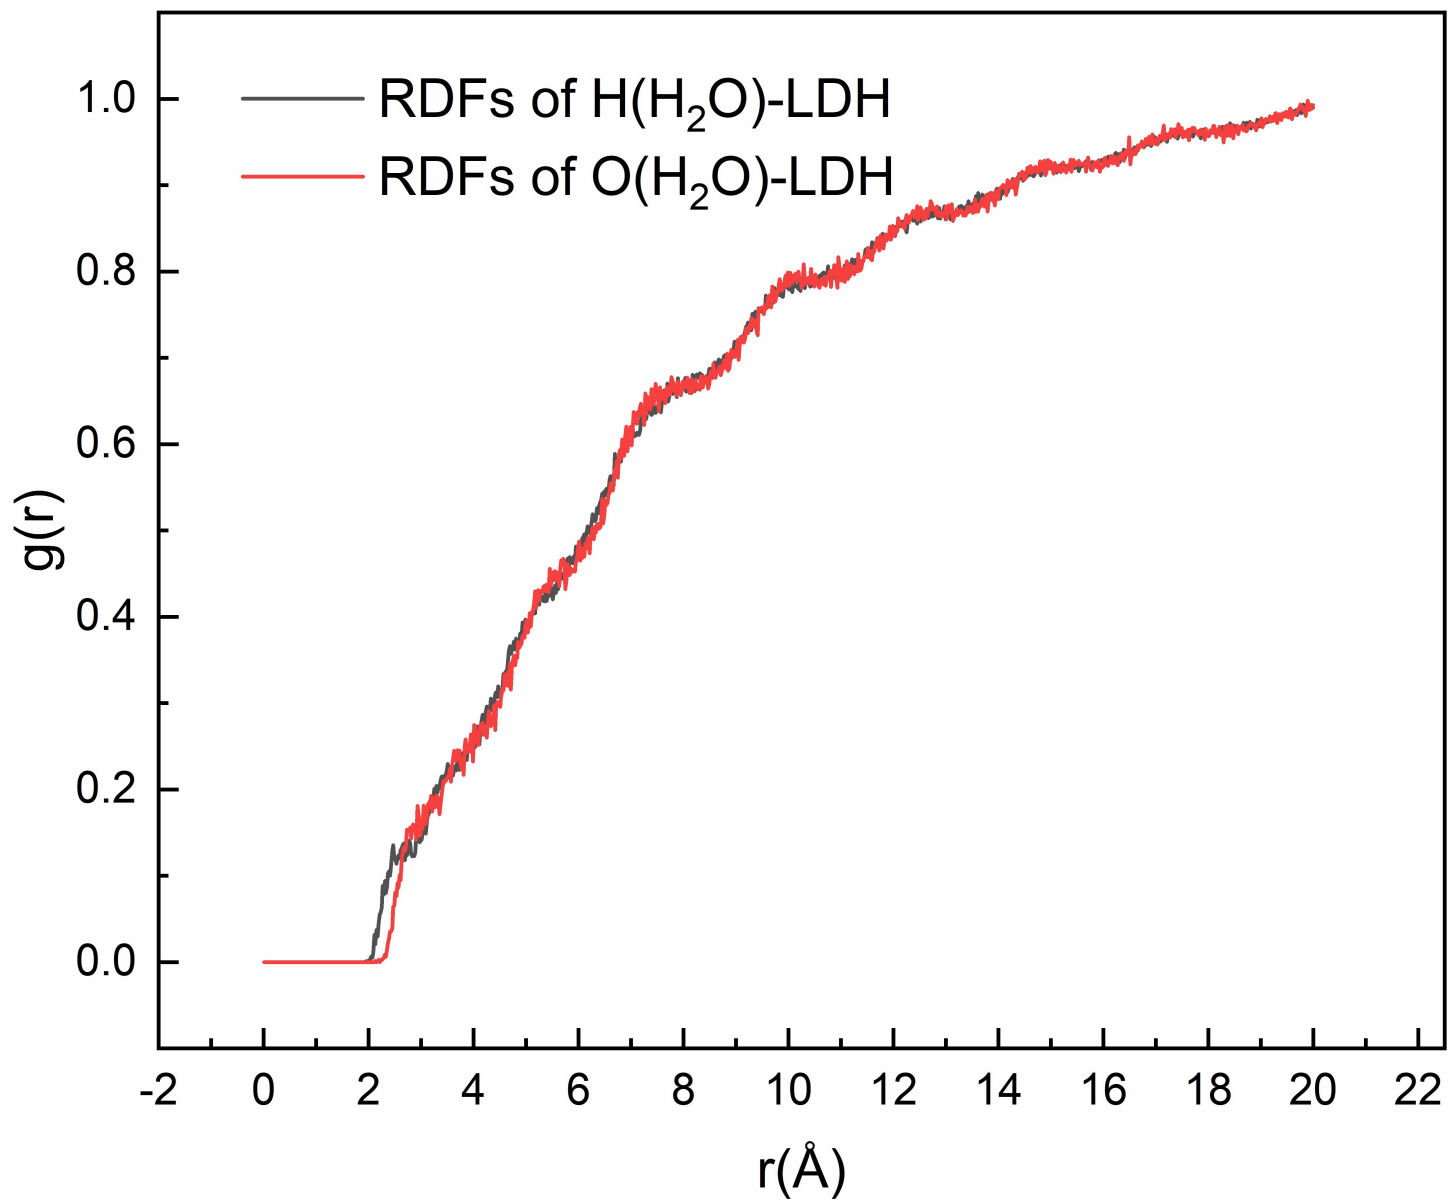

Supplement: d2nj01360f5.pdf [file d2nj01360f5.pdf]
